# Supplementary material for: Preparation of activated carbon from Dipterocarpus alatus fruit and its application for methylene blue adsorption
Source: Royal Society of Chemistry journal article supplement (doi:10.1039/d0ra03427d), 2020-01-01
Supplement: d0ra03427d1.pdf [file d0ra03427d1.pdf]

Supporting information for:

**Preparation of activated carbon from *Dipterocarpus alatus* fruit and its application for methylene blue adsorption**

Chantakorn Patawat,<sup>a</sup> Ketsara Silakatea,<sup>a</sup> Somchai Chuan-Udom,<sup>b</sup> Nontipa Supanchaiyamat,<sup>c</sup>  
Andrew J. Hunt,<sup>c</sup> and Yuvarat Ngernyen<sup>\*a</sup>

<sup>a</sup> *Biomass & Bioenergy Research Laboratory, Department of Chemical Engineering, Faculty of Engineering, Khon Kaen University, Khon Kaen, 40002, Thailand. E-mail:nyuvarat@kku.ac.th*

<sup>b</sup> *Department of Agricultural Engineering, Faculty of Engineering, Khon Kaen University, Khon Kaen, 40002, Thailand*

<sup>c</sup> *Materials Chemistry Research Center, Department of Chemistry and Center of Excellence for Innovation in Chemistry, Faculty of Science, Khon Kaen University, Khon Kaen, 40002, Thailand*

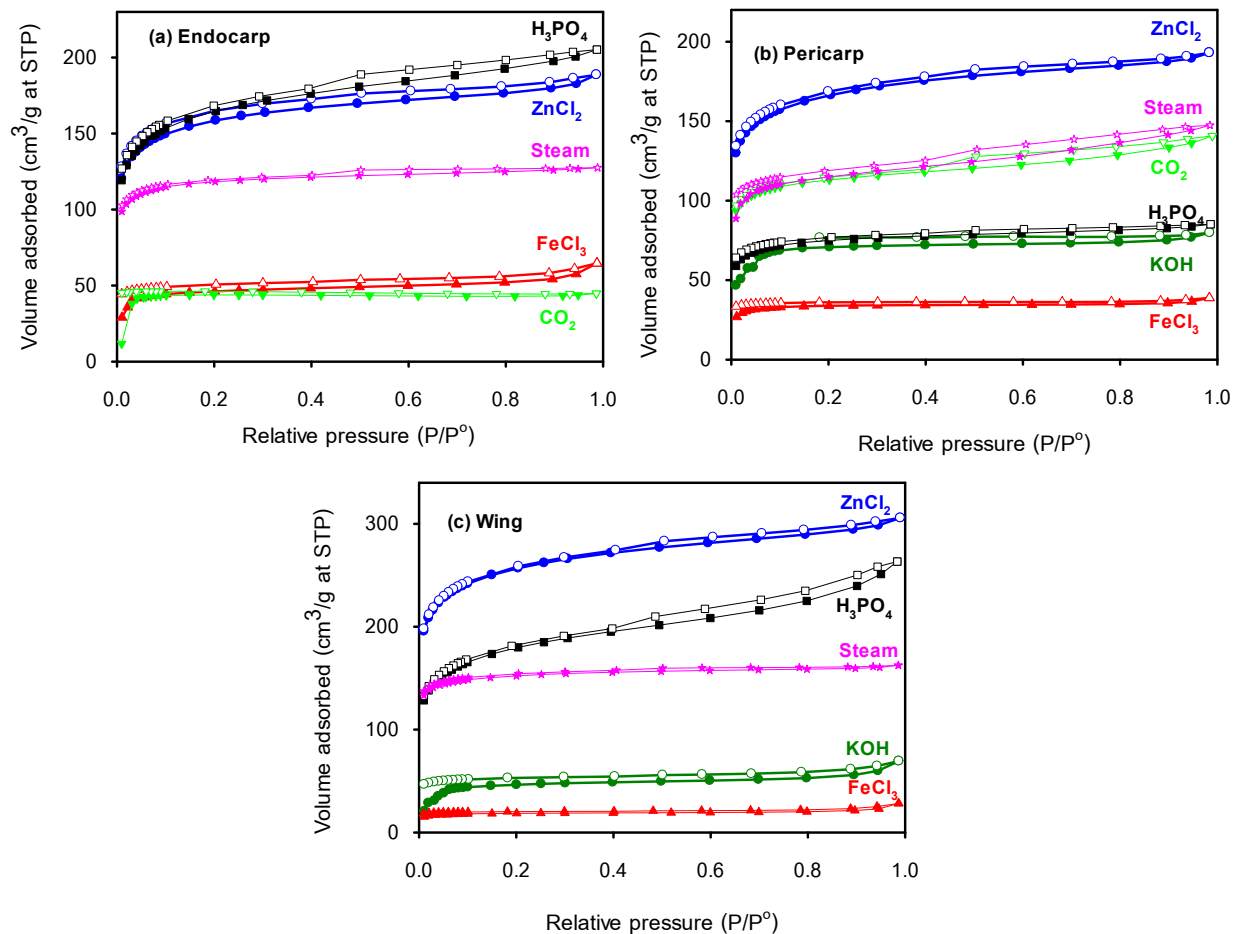

**Fig. S1** N<sub>2</sub> adsorption (filled symbols) and desorption (empty symbols) isotherms for activated carbons produced from each part of DF.

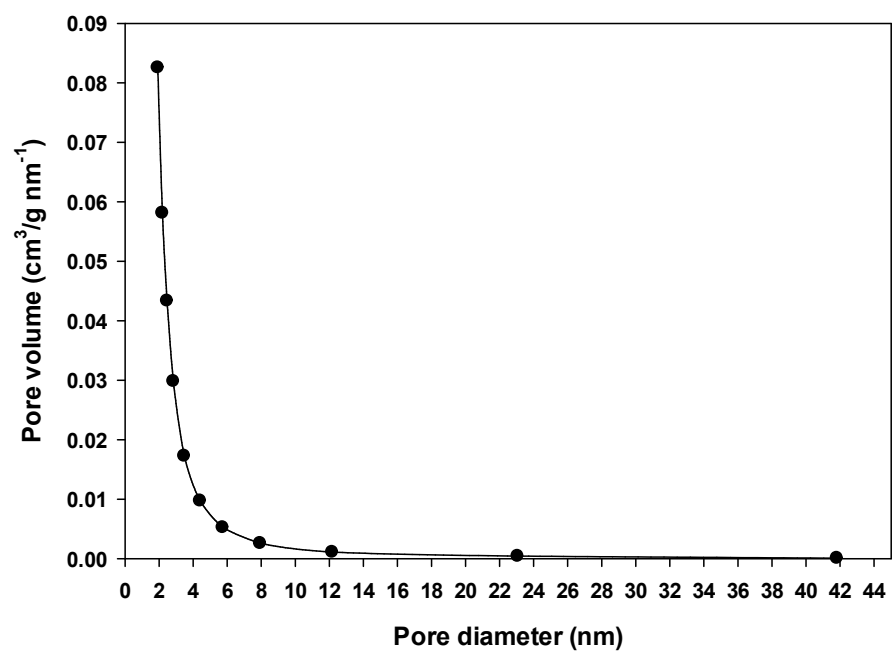

**Fig. S2** Pore size distribution of ZnCl<sub>2</sub> activated carbon.

**Table S1** Yield and porous structure parameters of DF activated carbons prepared by various activating agents

| Sample                         | Yield (wt.%) | $S_{\text{BET}}$ ( $\text{m}^2 \text{g}^{-1}$ ) | $V_{\text{mic}}$ ( $\text{cm}^3 \text{g}^{-1}$ ) | $V_{\text{meso}}$ ( $\text{cm}^3 \text{g}^{-1}$ ) | $V_{\text{T}}$ ( $\text{cm}^3 \text{g}^{-1}$ ) | $D_{\text{p}}$ (nm) |
|--------------------------------|--------------|-------------------------------------------------|--------------------------------------------------|---------------------------------------------------|------------------------------------------------|---------------------|
| <b>Endocarp</b>                |              |                                                 |                                                  |                                                   |                                                |                     |
| ZnCl <sub>2</sub>              | 31           | 517                                             | 0.161 (55%)                                      | 0.131 (45%)                                       | 0.292                                          | 2.26                |
| FeCl <sub>3</sub>              | 48           | 151                                             | 0.054 (54%)                                      | 0.046 (46%)                                       | 0.100                                          | 2.66                |
| H <sub>3</sub> PO <sub>4</sub> | 34           | 540                                             | 0.149 (47%)                                      | 0.168 (53%)                                       | 0.317                                          | 2.35                |
| KOH                            | 15           | 146                                             | 0.044 (47%)                                      | 0.049 (53%)                                       | 0.093                                          | 2.54                |
| CO <sub>2</sub>                | 44           | 132                                             | 0.064 (93%)                                      | 0.005 (7%)                                        | 0.069                                          | 2.09                |
| Steam                          | 40           | 379                                             | 0.150 (76%)                                      | 0.047 (24%)                                       | 0.197                                          | 2.08                |
| <b>Pericarp</b>                |              |                                                 |                                                  |                                                   |                                                |                     |
| ZnCl <sub>2</sub>              | 30           | 541                                             | 0.172 (58%)                                      | 0.127 (42%)                                       | 0.299                                          | 2.21                |
| FeCl <sub>3</sub>              | 41           | 108                                             | 0.045 (75%)                                      | 0.015 (25%)                                       | 0.060                                          | 2.23                |
| H <sub>3</sub> PO <sub>4</sub> | 33           | 243                                             | 0.087 (66%)                                      | 0.045 (34%)                                       | 0.132                                          | 2.17                |
| KOH                            | 20           | 229                                             | 0.088 (71%)                                      | 0.035 (29%)                                       | 0.123                                          | 2.16                |
| CO <sub>2</sub>                | 42           | 365                                             | 0.134 (63%)                                      | 0.078 (37%)                                       | 0.212                                          | 2.38                |
| Steam                          | 39           | 375                                             | 0.132 (57%)                                      | 0.096 (34%)                                       | 0.228                                          | 2.43                |
| <b>Wing</b>                    |              |                                                 |                                                  |                                                   |                                                |                     |
| ZnCl <sub>2</sub>              | 32           | 843                                             | 0.256 (54%)                                      | 0.217 (46%)                                       | 0.473                                          | 2.24                |
| FeCl <sub>3</sub>              | 42           | 60                                              | 0.024 (54%)                                      | 0.020 (46%)                                       | 0.044                                          | 2.90                |
| H <sub>3</sub> PO <sub>4</sub> | 30           | 597                                             | 0.145 (35%)                                      | 0.262 (65%)                                       | 0.407                                          | 2.73                |
| KOH                            | 15           | 154                                             | 0.048 (45%)                                      | 0.059 (55%)                                       | 0.107                                          | 2.79                |
| CO <sub>2</sub>                | 50           | 92                                              | 0.037 (78%)                                      | 0.010 (22%)                                       | 0.047                                          | 2.05                |
| Steam                          | 35           | 491                                             | 0.198 (79%)                                      | 0.053 (21%)                                       | 0.251                                          | 2.05                |
